# Supplementary material for: Linkage between Neighborhood Social Cohesion and BMI of South Asians in the Masala Study
Source: Hindawi journal article supplement (doi:10.1155/2020/7937530), 2020-01-07
Supplement: f1 [file 7937530.f1.pdf]

| <b>Supplementary Table 1. Principal component factor analysis</b> |                   |                   |                   |                   |
|-------------------------------------------------------------------|-------------------|-------------------|-------------------|-------------------|
| <b>Factor</b>                                                     | <b>Eigenvalue</b> | <b>Difference</b> | <b>Proportion</b> | <b>Cumulative</b> |
| Factor1                                                           | 2.17081           | 1.17261           | 0.4342            | 0.4342            |
| Factor2                                                           | 0.9982            | 0.28263           | 0.1996            | 0.6338            |
| Factor3                                                           | 0.71557           | 0.07104           | 0.1431            | 0.7769            |
| Factor4                                                           | 0.64453           | 0.17363           | 0.1289            | 0.9058            |
| Factor5                                                           | 0.4709            | .                 | 0.0942            | 1                 |

1

| <b>Supplementary Table 2. Factor loadings and unique variances</b>    |                 |                   |
|-----------------------------------------------------------------------|-----------------|-------------------|
| <b>Item</b>                                                           | <b>Factor 1</b> | <b>Uniqueness</b> |
| People around here are willing to help their neighbors                | 0.7955          | 0.3672            |
| People in this neighborhood generally don't get along with each other | 0.602           | 0.6376            |
| People in this neighborhood can be trusted                            | 0.6997          | 0.5104            |
| People in this neighborhood do not share the same values              | 0.5719          | 0.673             |
| Most people in the neighborhood know each other                       | 0.5992          | 0.6409            |

2

| <b>Supplementary Table 3. Scoring coefficients (method=regression; based on varimax rotated factors)</b> |                |
|----------------------------------------------------------------------------------------------------------|----------------|
| <b>Item</b>                                                                                              | <b>Factor1</b> |
| People around here are willing to help their neighbors                                                   | 0.36644        |
| People in this neighborhood generally don't get along with each other                                    | 0.2773         |
| People in this neighborhood can be trusted                                                               | 0.32232        |
| People in this neighborhood do not share the same values                                                 | 0.26343        |
| Most people in the neighborhood know each other                                                          | 0.27603        |

3
